# Supplementary material
Source: PubMed Central journal article supplement (PMC7548914)
Supplement: lic-0009-0583-s03.pdf [file lic-0009-0583-s03.pdf]

**Supplementary Table 1. Baseline characteristics of patients with advanced HCC in cohort 3 (patients with both MVI and EHM).**

| Demographics/characteristics         | Unmatched          |                          |        | Matched            |                         |        |
|--------------------------------------|--------------------|--------------------------|--------|--------------------|-------------------------|--------|
|                                      | HAIC<br>n = 48 (%) | Sorafenib<br>n = 167 (%) | SMD    | HAIC<br>n = 44 (%) | Sorafenib<br>n = 44 (%) | SMD    |
| Age, mean                            | 64.1               | 67.5                     | 0.348  | 64.4               | 69.0                    | 0.495  |
| Gender, male                         | 43 (89.6)          | 149 (89.2)               | -0.012 | 39 (88.6)          | 37 (84.1)               | -0.133 |
| HCV positive                         | 18 (37.5)          | 61 (36.5)                | 0.020  | 15 (34.1)          | 15 (34.1)               | 0.000  |
| HBV positive                         | 12 (25.0)          | 43 (25.7)                | -0.017 | 12 (27.3)          | 13 (29.5)               | -0.050 |
| Alcohol abuse                        | 7 (14.6)           | 20 (12.0)                | 0.077  | 7 (15.9)           | 4 (9.1)                 | 0.207  |
| Major MVI*                           | 39 (81.3)          | 106 (63.5)               | 0.406  | 35 (79.5)          | 37 (84.1)               | -0.118 |
| Size of intrahepatic lesion, >50 mm* | 20 (41.7)          | 65 (39.2)                | 0.051  | 18 (40.9)          | 13 (29.5)               | 0.240  |
| Number of intrahepatic lesions, >3*  | 34 (70.8)          | 126 (75.4)               | -0.104 | 32 (72.7)          | 34 (77.3)               | -0.105 |
| Number of metastatic sites >1*       | 6 (12.5)           | 47 (28.1)                | 0.354  | 5 (11.4)           | 6 (13.6)                | 0.050  |
| Child–Pugh class A*                  | 31 (66.0)          | 135 (81.3)               | -0.068 | 31 (70.5)          | 32 (72.7)               | 0.093  |
| AFP, >400 ng/mL                      | 28 (58.3)          | 103 (61.7)               | -0.396 | 28 (63.6)          | 26 (59.1)               | 0.495  |

Abbreviations: AFP, alfa-fetoprotein; EHM, extrahepatic metastasis; HAIC, hepatic arterial infusion chemotherapy; HBV, hepatitis B virus; HCV, hepatitis C virus; MVI, macrovascular invasion; SMD, standardized mean difference.

\*Major MVI, size of intrahepatic lesion, number of intrahepatic lesions, number of metastatic sites, Child–Pugh class, and AFP were matched in cohort 3.

**Supplementary Table 2. Baseline characteristics of patients with advanced HCC patients in cohort 4 (patients without MVI and with EHM).**

| Demographics/characteristics         | Unmatched          |                          |        | Matched           |                         |        |
|--------------------------------------|--------------------|--------------------------|--------|-------------------|-------------------------|--------|
|                                      | HAIC<br>n = 22 (%) | Sorafenib<br>n = 424 (%) | SMD    | HAIC<br>n = 9 (%) | Sorafenib<br>n = 19 (%) | SMD    |
| Age, mean                            | 68.1               | 69.7                     | 0.174  | 70.2              | 68.4                    | -0.188 |
| Gender, male                         | 19 (86.4)          | 341 (80.4)               | -0.160 | 7 (78.6)          | 17 (89.5)               | 0.320  |
| HCV positive                         | 9 (40.9)           | 192 (45.3)               | -0.088 | 3 (32.1)          | 6 (31.6)                | 0.037  |
| HBV positive                         | 3 (13.6)           | 93 (21.9)                | -0.218 | 1 (10.7)          | 8 (42.1)                | -0.749 |
| Alcohol abuse                        | 3 (13.6)           | 39 (9.2)                 | 0.140  | 2 (21.4)          | 5 (26.3)                | -0.096 |
| Size of intrahepatic lesion, >50 mm* | 5 (22.7)           | 57 (14.1)                | 0.225  | 4 (42.9)          | 4 (21.1)                | 0.515  |
| Number of intrahepatic lesions, >7*  | 15 (68.2)          | 143 (35.2)               | 0.699  | 5 (57.1)          | 11 (57.9)               | -0.047 |
| Number of metastatic sites, >1*      | 3 (13.6)           | 105 (24.8)               | -0.285 | 2 (21.4)          | 4 (21.1)                | 0.028  |
| Child–Pugh class A*                  | 14 (66.7)          | 389 (92.8)               | 0.689  | 6 (64.3)          | 12 (63.2)               | -0.074 |
| AFP, >400 ng/mL*                     | 14 (63.6)          | 272 (64.2)               | 0.011  | 6 (64.3)          | 11 (57.9)               | -0.182 |

Abbreviations: AFP, alfa-fetoprotein; EHM, extrahepatic metastasis; HAIC, hepatic arterial infusion chemotherapy; HBV, hepatitis B virus; HCV, hepatitis C virus; MVI, macrovascular invasion; SMD, standardized mean difference.

\*Size of intrahepatic lesion, number of intrahepatic lesions, number of metastatic sites, Child–Pugh class, and AFP were matched in cohort 4

**Supplementary Table 3. Subgroup analyses of patients with advanced HCC according to MVI**

| <b>Subgroup</b>           | <b>HAIC<br/>(month, 95%CI)</b> | <b>Sorafenib<br/>(month, 95% CI)</b> | <b>HR<br/>(95%CI)</b> | <b>P-value<br/>(Log-rank)</b> |
|---------------------------|--------------------------------|--------------------------------------|-----------------------|-------------------------------|
| <b>Cohort 1 (matched)</b> |                                |                                      |                       |                               |
| Minor MVI                 | 15.4 (8.8–21.0)                | 10.0 (5.8–15.2)                      | 0.669 (0.458–0.978)   | 0.036                         |
| Major MVI                 | 9.6 (7.7–12.3)                 | 8.4 (5.9–12.3)                       | 0.831 (0.608–1.136)   | 0.244                         |
| VP≤2                      | 14.1 (8.8–10.9)                | 9.5 (6.1–14.4)                       | 0.710 (0.505–0.999)   | 0.048                         |
| VP≥3                      | 9.3 (7.7–12.3)                 | 8.2 (5.8–12.3)                       | 0.792(0.562–1.116)    | 0.182                         |
| <b>Cohort 3 (matched)</b> |                                |                                      |                       |                               |
| Minor MVI                 | 6.6 (1.5–9.3)                  | 9.8 (2.2–22.1)                       | 1.318 (0.461–3.759)   | 0.606                         |
| Major MVI                 | 5.0 (4.2–14.4)                 | 4.9 (3.5–5.6)                        | 0.592 (0.349–1.005)   | 0.049                         |
| VP≤2                      | 6.6 (4.2–7.7)                  | 5.9 (3.4–14.9)                       | 0.814 (0.391–1.693)   | 0.580                         |
| VP≥3                      | 11.5 (3.5–15.3)                | 4.6 (3.4–5.6)                        | 0.496 (0.265–0.927)   | 0.025                         |

Abbreviations: CI, confidence interval; HR, hazard ratio; MVI, macrovascular invasion.

**Supplementary Table 4. Multivariate survival analyses of HAIC in patients with advanced HCC**

| Covariate                       | All populations |             |         |
|---------------------------------|-----------------|-------------|---------|
|                                 | HR              | 95%CI       | P-value |
| <b>Age (years)</b>              |                 |             |         |
| ≤69.2                           | Reference       |             |         |
| >69.2                           | 1.140           | 0.889–1.461 | 0.303   |
| <b>Sex</b>                      |                 |             |         |
| Male                            | Reference       |             |         |
| Female                          | 0.899           | 0.663–1.219 | 0.493   |
| <b>HCV</b>                      |                 |             |         |
| Negative                        | Reference       |             |         |
| Positive                        | 0.778           | 0.596–1.014 | 0.063   |
| <b>HBV</b>                      |                 |             |         |
| Negative                        | Reference       |             |         |
| Positive                        | 0.830           | 0.599–1.150 | 0.263   |
| <b>Alcohol abuse</b>            |                 |             |         |
| Negative                        | Reference       |             |         |
| Positive                        | 0.874           | 0.624–1.224 | 0.434   |
| <b>Tumor status</b>             |                 |             |         |
| MVI (+), EHM (-)                | Reference       |             |         |
| MVI (-), EHM (-)                | 0.946           | 0.673–1.330 | 0.750   |
| MVI (+), EHM (+)                | 1.383           | 0.962–1.962 | 0.080   |
| MVI (-), EHM (+)                | 1.640           | 0.985–2.732 | 0.057   |
| <b>Child–Pugh Class</b>         |                 |             |         |
| A                               | Reference       |             |         |
| B                               | 1.654           | 1.285–2.130 | <0.001  |
| <b>AFP (ng/mL)</b>              |                 |             |         |
| ≤400                            | Reference       |             |         |
| >400                            | 1.026           | 0.806–1.306 | 0.835   |
| <b>Number of previous TACEs</b> |                 |             |         |
| 0                               | Reference       |             |         |
| >1                              | 0.957           | 0.742–1.235 | 0.736   |
| <b>Regimen</b>                  |                 |             |         |
| 5FU + CDDP                      | Reference       |             |         |
| 5FU + IFN                       | 0.839           | 0.612–1.152 | 0.278   |
| CDDP                            | 1.072           | 0.760–1.512 | 0.693   |
| Other                           | 0.661           | 0.160–2.729 | 0.567   |

Abbreviations: AFP, alfa-fetoprotein; CDDP, cisplatin; EHM, extrahepatic metastasis; 5FU, 5-fluorouracil; HBV, hepatitis B virus; HCV, hepatitis C virus; HR, hazard ratio; IFN, interferon; MVI, macrovascular invasion; TACE, transarterial chemoembolization.

**Supplementary Table 5. Multivariate survival analyses of HAIC in patients with advanced HCC**

(subpopulation of patients with MVI and without EHM).

| Covariate                                      | Patients with MVI and without EHM |             |         |
|------------------------------------------------|-----------------------------------|-------------|---------|
|                                                | HR                                | 95%CI       | P-value |
| <b>Age (years)</b>                             |                                   |             |         |
| ≤68.0                                          | Reference                         |             |         |
| >68.0                                          | 1.065                             | 0.777–1.460 | 0.694   |
| <b>Sex</b>                                     |                                   |             |         |
| Male                                           | Reference                         |             |         |
| Female                                         | 0.932                             | 0.640–1.357 | 0.713   |
| <b>HCV</b>                                     |                                   |             |         |
| Negative                                       | Reference                         |             |         |
| Positive                                       | 0.725                             | 0.517–1.017 | 0.063   |
| <b>HBV</b>                                     |                                   |             |         |
| Negative                                       | Reference                         |             |         |
| Positive                                       | 0.742                             | 0.497–1.106 | 0.143   |
| <b>Alcohol abuse</b>                           |                                   |             |         |
| Negative                                       | Reference                         |             |         |
| Positive                                       | 0.720                             | 0.472–1.098 | 0.127   |
| <b>MVI</b>                                     |                                   |             |         |
| Minor                                          | Reference                         |             |         |
| Major                                          | 1.310                             | 0.952–1.801 | 0.097   |
| <b>Maximum size of intrahepatic lesion(mm)</b> |                                   |             |         |
| ≤50                                            | Reference                         |             |         |
| >50                                            | 1.149                             | 0.806–1.638 | 0.442   |
| <b>Number of intrahepatic lesions</b>          |                                   |             |         |
| ≤3                                             | Reference                         |             |         |
| >3                                             | 1.431                             | 1.031–1.986 | 0.032   |
| <b>Child–Pugh Class</b>                        |                                   |             |         |
| A                                              | Reference                         |             |         |
| B                                              | 1.405                             | 1.026–1.925 | 0.034   |
| <b>AFP (ng/mL)</b>                             |                                   |             |         |
| ≤400                                           | Reference                         |             |         |
| >400                                           | 1.048                             | 0.778–1.410 | 0.758   |
| <b>Number of previous TACEs</b>                |                                   |             |         |
| 0                                              | Reference                         |             |         |
| >1                                             | 0.964                             | 0.700–1.328 | 0.823   |
| <b>Regimen</b>                                 |                                   |             |         |
| 5FU + CDDP                                     | Reference                         |             |         |
| 5FU + IFN                                      | 0.819                             | 0.553–1.214 | 0.320   |
| CDDP                                           | 1.102                             | 0.691–1.758 | 0.683   |
| Other                                          | 0.922                             | 0.207–4.112 | 0.915   |

Abbreviations: AFP, alfa-fetoprotein; CDDP, cisplatin; EHM, extrahepatic metastasis; 5FU, 5-fluorouracil; HBV, hepatitis B virus; HCV, hepatitis C virus; HR, hazard ratio; IFN, interferon; MVI, macrovascular invasion; TACE, transarterial chemoembolization.

**Supplementary Table 6. Post treatments of patients with advanced HCC in cohort 1 (patients with MVI and without EHM).**

| Post treatment                                       | Unmatched           |                          | Matched             |                          |
|------------------------------------------------------|---------------------|--------------------------|---------------------|--------------------------|
|                                                      | HAIC<br>n = 270 (%) | Sorafenib<br>n = 263 (%) | HAIC<br>n = 170 (%) | Sorafenib<br>n = 170 (%) |
| Sorafenib                                            | 54 (20.4)           | –                        | 40 (23.5)           | –                        |
| HAIC                                                 | –                   | 59 (24.1%)               | –                   | 38 (24.2)                |
| TACE                                                 | 46 (17.4)           | 31 (12.7)                | 34 (20.0)           | 21 (13.5)                |
| Radiation                                            | 27 (10.2)           | 12 (5.0)                 | 18 (10.6)           | 10 (6.5)                 |
| Other systemic therapies (including clinical trials) | 28 (10.6)           | 27 (11.1)                | 23 (13.5)           | 21 (13.6)                |

Abbreviations: HAIC, hepatic arterial infusion chemotherapy; TACE, transarterial chemoembolization.

**Supplementary Table 7. Post treatments of advanced HCC patients with cohort 2 (patients without both MVI and EHM).**

| Post treatment                                       | Unmatched          |                          | Matched            |                         |
|------------------------------------------------------|--------------------|--------------------------|--------------------|-------------------------|
|                                                      | HAIC<br>n = 89 (%) | Sorafenib<br>n = 492 (%) | HAIC<br>n = 76 (%) | Sorafenib<br>n = 76 (%) |
| Sorafenib                                            | 16 (18.6)          | –                        | 15 (19.7)          | –                       |
| HAIC                                                 | –                  | 102 (21.7)               | –                  | 13 (18.3)               |
| TACE                                                 | 14 (16.3)          | 136 (28.9)               | 11 (14.5)          | 24 (33.3)               |
| Radiation                                            | 6 (7.0)            | 18 (3.9)                 | 6 (7.9)            | 4 (5.7)                 |
| Other systemic therapies (including clinical trials) | 11 (12.8)          | 83 (17.7)                | 10 (13.2)          | 13 (18.3)               |

Abbreviations: HAIC, hepatic arterial infusion chemotherapy; TACE, transarterial chemoembolization.

**Supplementary Table 8. Post treatments of advanced HCC patients with cohort 3 (patients without both MVI and EHM).**

| Post treatment                                       | Unmatched          |                          | Matched            |                         |
|------------------------------------------------------|--------------------|--------------------------|--------------------|-------------------------|
|                                                      | HAIC<br>n = 89 (%) | Sorafenib<br>n = 492 (%) | HAIC<br>n = 76 (%) | Sorafenib<br>n = 76 (%) |
| Sorafenib                                            | 16 (18.6)          | –                        | 15 (19.7)          | –                       |
| HAIC                                                 | –                  | 102 (21.7)               | –                  | 13 (18.3)               |
| TACE                                                 | 14 (16.3)          | 136 (28.9)               | 11 (14.5)          | 24 (33.3)               |
| Radiation                                            | 6 (7.0)            | 18 (3.9)                 | 6 (7.9)            | 4 (5.7)                 |
| Other systemic therapies (including clinical trials) | 11 (12.8)          | 83 (17.7)                | 10 (13.2)          | 13 (18.3)               |

Abbreviations: HAIC, hepatic arterial infusion chemotherapy; TACE, transarterial chemoembolization.



**Supplementary Table 9. Post treatments of advanced HCC patients with cohort 4 (patients without MVI and with EHM).**

| Post treatment                                       | Unmatched          |                          | Matched            |                         |
|------------------------------------------------------|--------------------|--------------------------|--------------------|-------------------------|
|                                                      | HAIC<br>n = 22 (%) | Sorafenib<br>n = 424 (%) | HAIC<br>n = 19 (%) | Sorafenib<br>n = 19 (%) |
| Sorafenib                                            | 6 (27.3)           | –                        | 5 (26.3)           | –                       |
| HAIC                                                 | –                  | 40 (10.0)                | –                  | 7 (36.8)                |
| TACE                                                 | 2 (9.1)            | 57 (14.1)                | 1 (5.3)            | 0 (0.0)                 |
| Radiation                                            | 3 (13.6)           | 58 (14.5)                | 2 (10.5)           | 0 (0.0)                 |
| Other systemic therapies (including clinical trials) | 2 (9.1)            | 96 (23.6)                | 2 (10.5)           | 4 (21.1)                |

Abbreviations: HAIC, hepatic arterial infusion chemotherapy; TACE, transarterial chemoembolization.
